# Supplementary material
Source: Research Square preprint supplement (doi:10.21203/rs.3.rs-9036222/v1)
Supplement: Supplementary file 1 [file 1747567d528a4b139acb27fd.docx]

Appendix 1: Interview Guide

- **Introductory question:** Can you tell me when and why the initiative/business was started? What are the goals of the initiative?

**Your role**

- **Vision** for future food system (sense-making and envisioning, amplifying)
- What does it look like? Social and ecological features? Has this changed since the initiative started?
- What needs to be done/changed to reach there? What are the barriers?
- How do you look upon your role in this? How is your initiative contributing to reach there?
- Have you seen any results of this yet? Please describe!
- How do you think these results could be increased?
- Main **developments** of initiative during last 5-7 years (gathering momentum, amplifying)
- Strategic management – strategies
  - Resource mobilisation (Financial, human, knowledge, physical?)
  - Decision-making
  - Diversity
  - Spreading the initiative?
- New ideas and innovations
  - What are the most innovative aspects of your initiative?
  - What is unique?
- Collaborations and Networks of support (development during the last years)
  - Interactions (within and outside niche) - What kind of relations are important?
  - Are some collaborators/relations more important than others? What are those characteristics? Specific support?
  - Scales
  - Members/customers – Increased or decreased? Who are they? How do you reach new ones?
  - Empowerment
  - Influence (impacting laws and policy, values and norms) (scaling up) - Advocacy and lobbying
- Communication strategy
  - What would you like to achieve with your communication?
  - Awareness – changing mindsets and perspectives, values, norms and beliefs (scaling deep) – how?
  - Channels – platforms
  - Learning and knowledge
- What kinds of knowledge is used in your initiative/business? (Indigenous, traditional, local, spiritual etc.)
- What knowledge would your initiative/business need more of to pursue its goals?
  - Spreading knowledge?
- Relation to nature and ecosystems
- **Success and challenges**
- What are, according to you, the initiative’s main successes in relation to its goals?
- What enables these successes? External and internal factors (relations, financial, institutions, trends…)
- What could further enhance the successes?
  - What are the main challenges you face to increase your impact?
  - How do you tackle them? Different strategies?
  - Are there specific trends in society that are supporting your aim and/or success? Are there trends creating barriers?
  - What are the main risks you are facing?
- **Final question:** How do you look upon the future? Special plans?
- **Any contacts to other initiatives on the food system?**

## Appendix 2: Coding structure

| Code | Description |
| --- | --- |
| Amplification processes | Contains the eight amplification processes as described in the typology by Lam et al. (2020). |
| Growing | Evidence of how seed initiatives reach out to more places and people and extend their impact range. |
| Niche | Evidence of how seed initiatives explain that they aim to stay in their niche but to grow within it. |
| Partnerships | Evidence of how seed initiatives make efforts to grow through partnerships. |
| Reaching new clients or customers | Describes how seed initiatives work to reach out to new clients or customers. |
| Strategies | Other strategies and ideas on how to grow. |
| Replicating | Processes where the seed initiative is copied and planted in a different context. |
| Scaling deep | Efforts aiming to change or influence norms, values, and mindsets. |
| Appealing | Changing values and behaviours through making sustainable and healthy food attractive. |
| Communication | Evidence of how seed initiatives communicate with and inform customers and clients. |
| Education and learning | Evidence of how seed initiatives work with education and learning as a way of scaling deep. |
| Events | Evidence of how seed initiatives try to change values, norms and behaviours through organizing events that are not primarily educational. |
| Media | Evidence of how seed initiatives use different kinds of media and platforms to spread their message. |
| Partnerships | Evidence of how seed initiatives work together with others to change norms, values, and behaviours. |
| Scaling up | Processes aiming to impact institutions, policy, rules, and laws. |
| Speeding up | Evidence of how seed actors try to increase the pace of change created by the initiative. |
| Spreading | Includes examples of seed initiatives' activities in which ideas and ways of doing things are spreading or inspiring other actors. |
| Stabilizing | Contains sub-codes relating to efforts aiming to make the impact of the initiative last longer through increasing the resilience of the seed initiative and ensure its longevity. |
| Financial viability | Code for how seed initiatives improve their financial viability. |
| Partnerships for stability | Includes passages that explains how seed initiatives connect to strategic partners to increase their financial stability or to grow. |
| Resilience | Indicates how seed actors undertake efforts to increase the resilience of their organisation. |
| Decision making | Relates to different aspects of decision-making processes and how those aim to stabilize the seed. |
| Diversifying | Examples of how seed initiatives diversify their activities and methods to build a more resilient organisation or business. |
| Internal systems and structures | Internal systems that are built up as a way of increasing the stability of the organisation. |
| Strategy - focus | Evidence of how seed initiatives develop strategies to stabilize and grow stronger and how they formulate and reformulate their focus. |
| Transferring | Processes implying that seed initiatives attempt to initiate an initiative in a similar context but independently from the original one. |
| Barriers | Collects all barriers that participants experience or see in their context, external and internal. |
| External | Barriers that are external to the seed initiatives and influence their ability to amplify their impact. |
| Capital mobilisation | Describe difficulties in mobilising resources and especially financial capital. |
| Food culture and convenience | Narratives of convenience and food culture (people tend to buy food that is easily available, cheap, highly processed, and easy to prepare etc.) and how that is a barrier for seed initiatives to reach out to the larger groups of people in society. |
| Corruption and crime | How corruption and crime make it more difficult for seed initiatives to manage their work. |
| Infrastructure and logistics | Lack of infrastructure and logistical aspects that hinder seed initiatives to progress and amplify. |
| Market access and regulations | Difficulties in entering a market and regulations, rules and norms that hinders seed initiatives to reach out to more people. |
| Internal | These are barriers that are found within the seed initiative and which they could to some extent influence. |
| Financial resources and viability | Financial aspects that are specifically seen a barrier for seed initiatives to expand their work or to do it with a higher quality. |
| Governance and internal systems | Governance or management issues that limits the seed initiatives in their operations. |
| Knowledge | Aspects of knowledge gaps that the seed initiatives experience as a barrier to amplify. |
| Resources | Indications of how limited or a lack of resources within the seed initiative constrains their work. |
| Collaboration and partnerships | Aspects related to collaboration and or partnerships with other actors. These could be ongoing, past, or planned ones. |
| Active collaborations | Descriptions of active collaborations. |
| Benefits | Descriptions of how seed initiatives benefit and profit from collaborations and partnerships. |
| Business partners | Specific examples of business partners and how seed initiatives relate to them. |
| Government support | Example of how seed initiatives receive support from or collaborate with the (local) government. |
| Important characteristics | Aspects emphasized as important for seed initiatives to collaborate, partner or network with others. |
| Mutually beneficial | The idea of how collaborations should benefit both parties. |
| Shared values | The importance of shared values in partnerships and collaborations. |
| Transparency | The value of transparency and honesty in partnerships and relations. |
| Trust | The importance of trust among parties in a collaboration. |
| Local suppliers | How seed initiatives collaborate with local suppliers and what kind of relationship they have. |
| Enablers | Identify enabling factors that drive or facilitate for seed initiatives to apply amplification processes. |
| External | External enablers that facilitate amplification. |
| Awards and recognition | Evidence of the importance of awards and recognition for seed initiatives. |
| Trends and development of food system | Include how trends in society and the food system contribute to seed initiatives' ability and or willingness to amplify. |
| Internal | These are enablers that are internal to the seed initiatives. |
| Knowledge | Different kinds of knowledge that facilitate the application of different amplification processes. |
| Motivation | Reasons to why seed initiatives were started or are progressing including philosophies, visions and showing an example. |
| Passion | Descriptions of participants' passion and interest for their engagement in the seed initiative. |
| Persistence and experimentation | Describe how seed initiatives continuously experiment and try things to develop and increase their impact. |
| Responsibility | Narratives of who has the responsibility to act. |
| Transformative capacity | This code builds on Ziervogel et al.'s (2016) framework of transformative capacity including reconnecting to the biosphere, social cohesion, and agency and innovation. |
| Agency | Code for a sense of independence but also connects to innovation and being an active co-creator of the future. |
| Innovation | Code for how seed initiatives experiment and innovate to better contribute to a desired change in the food system. |
| Reconnecting to biosphere | Code for how seed initiatives promote or increase an understanding of people’s dependence on the earth and its resources and works towards a healthy planet. |
| Social cohesion and community engagement | Code for how seed initiatives contribute to social cohesion through increasing community engagement and creating employment opportunities. |
